# Supplementary material for: A magnetic porous carbon material derived from an MIL-101(Fe) complex for efficient magnetic solid phase extraction of fluoroquinolone antibiotics
Source: Royal Society of Chemistry journal article supplement (doi:10.1039/d3an01060k), 2023-01-01
Supplement: d3an01060k1.pdf [file d3an01060k1.pdf]

## Supplementary Materials

A magnetic porous carbon material derived from MIL-101(Fe)  
complex for the efficient magnetic solid phase extraction of  
fluoroquinolone antibiotics

Xuening Gao<sup>1</sup>, Jingwen Lin, Tianning Li, Xiaoqing Zhang, Baizhao Zeng, Xiaoling  
Wang\*, Faqiong Zhao\*

*College of Chemistry and Molecular Sciences, Wuhan University, Wuhan 430072,  
Hubei Province, P. R. China*

---

\*Corresponding author.

Tel: 86-27-68752701, Fax: 86-27-68754067.

E-mail address: wangxiaoling@whu.edu.cn (X. L. Wang); fqzhao@whu.edu.cn (F.Q. Zhao)

## **Table of contents**

### **Reagents and apparatus**

**Table. S1.** Structures and properties of the studied FQs.

**Table. S2.** Content of component elements in MPCs.

**Table. S3.** Comparison of fitting parameters of Langmuir equation and Freundlich equation for FQs on MPCs.

**Table. S4.** Comparison of fitting parameters of Pseudo-first-order model and Pseudo-second-order model.

**Fig. S1.** The N<sub>2</sub> adsorption-desorption isotherms of MIL101-(Fe)-MWCNTs-GO.

**Fig. S2.** Optimization of MPC component.

**Fig. S3.** Optimization of MSPE parameters.

**Fig. S4.** Optimization of elution parameters.

**Fig. S5.** Reusable times of MPCs.

**Fig. S6.** Chromatograms of FQs in actual sample.

## Reagents and apparatus

MWCNTs and GO were purchased from XFNANO Materials Tech (Nanjing, China). Iron chloride hexahydrate ( $\text{FeCl}_3 \cdot 6\text{H}_2\text{O}$ ), 2-aminoterephthalic acid, N, N-dimethylformamide (DMF), sodium hydroxide (NaOH), hydrochloric acid (HCl), acetic acid ( $\text{CH}_3\text{COOH}$ ) and ammonium hydroxide ( $\text{NH}_3 \cdot \text{H}_2\text{O}$ ) were obtained from Sinopharm Chemical Reagent (Shanghai, China). polyvinyl pyrrolidone K13-18 (PVP), ciprofloxacin (CIP), enrofloxacin (ENO), lomefloxacin (LOM), ofloxacin (OFX) and formic acid were purchased from Aladdin-reagent (Shanghai, China). Methanol and acetonitrile (ACN, chromatographic grade) were obtained from Fisher Chemical (Shanghai, China). The chemical structures of the Fluoroquinolones are shown in Table. S1.

Scanning electron microscopy (SEM) images were obtained by field emission SEM (ZEISS SIGMA, Germany). Fourier transform Infrared (FT-IR) absorption spectrum were measured with model Nexus-670 spectrometer (Nicolet, USA). The X-ray diffraction spectrometry (XRD) analysis were tested by using Fixed Target X-ray powder crystal diffractometer Bruker D8 Advance (Germany). X-ray photoelectron spectroscopy (XPS) data were measured on ESCALAB 250Xi spectrometer (Thermo Fisher Scientific Inc, America). The magnetic hysteresis loop was recorded on vibrating sample magnetometer (PPMS-9VSM, QUANTUM, America). The pore size and  $\text{N}_2$  adsorption experiments were measured with a TriStar II plus (Micromeritics (Shanghai) Instruments Co.). Thermogravimetric curves was obtained on the SETSYS- 16 thermal gravimetric analyzer (TGA setaram, France). The zeta potential was measured with a Nano ZS90 Zeta Potential Analyzer (Malvern, England).

**Table. S1.** Structures and properties of the studied FQs.

| Component | CAS#       | Molecular formula       | Molecular weight | Molecular Structure                                                                  | Melting point (°C) |
|-----------|------------|-------------------------|------------------|--------------------------------------------------------------------------------------|--------------------|
| CIP       | 85721-33-1 | $C_{17}H_{18}FN_3O_3$   | 331              | 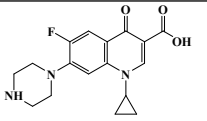  | 255-257            |
| LOM       | 98079-51-7 | $C_{17}H_{19}F_2N_3O_3$ | 351              |   | 239-240            |
| OFX       | 82419-36-1 | $C_{18}H_{20}FN_3O_4$   | 361              |   | 270-275            |
| ENO       | 93106-60-6 | $C_{19}H_{22}FN_3O_3$   | 359              |  | 225                |

**Table. S2.** Content of component elements in MPCs.

| Name      | C 1s  | N 1s | O 1s | Fe 2p |
|-----------|-------|------|------|-------|
| Atomic(%) | 89.32 | 5.28 | 4.54 | 0.86  |

**Table. S3.** Comparison of fitting parameters of Langmuir equation and Freundlich equation for FQs on MPCs

| Analytes | Langmuir equation                |                             |                | Freundlich equation |        |                |
|----------|----------------------------------|-----------------------------|----------------|---------------------|--------|----------------|
|          | $Q_{\max}$ (mg g <sup>-1</sup> ) | $K_l$ (L mg <sup>-1</sup> ) | R <sup>2</sup> | $K_F$               | $n$    | R <sup>2</sup> |
| OFX      | 43.54                            | 0.02224                     | 0.9711         | 1.4622              | 2.6189 | 0.9698         |
| CIP      | 104.06                           | 0.00972                     | 0.9803         | 1.4477              | 1.2729 | 0.9812         |
| LOM      | 110.62                           | 0.00945                     | 0.9799         | 1.7362              | 1.3227 | 0.9734         |
| ENO      | 117.37                           | 0.00878                     | 0.9836         | 1.5372              | 1.3644 | 0.9857         |

**Table. S4.** Comparison of fitting parameters of Pseudo-first-order model and Pseudo-second-order model

| Analytes | Pseudo-first-order model    |        |                | Pseudo-second-order model   |        |                |
|----------|-----------------------------|--------|----------------|-----------------------------|--------|----------------|
|          | $Q_e$ (mg g <sup>-1</sup> ) | $K_l$  | R <sup>2</sup> | $Q_e$ (mg g <sup>-1</sup> ) | $K_2$  | R <sup>2</sup> |
| OFX      | 4.9218                      | 0.0351 | 0.7859         | 12.7307                     | 0.0237 | 0.9745         |
| CIP      | 6.6852                      | 0.0275 | 0.4575         | 15.8002                     | 0.3671 | 0.9923         |
| LOM      | 5.4903                      | 0.0481 | 0.7305         | 14.2859                     | 0.0340 | 0.9954         |
| ENO      | 4.0349                      | 0.0308 | 0.6472         | 21.1148                     | 0.0267 | 0.9930         |

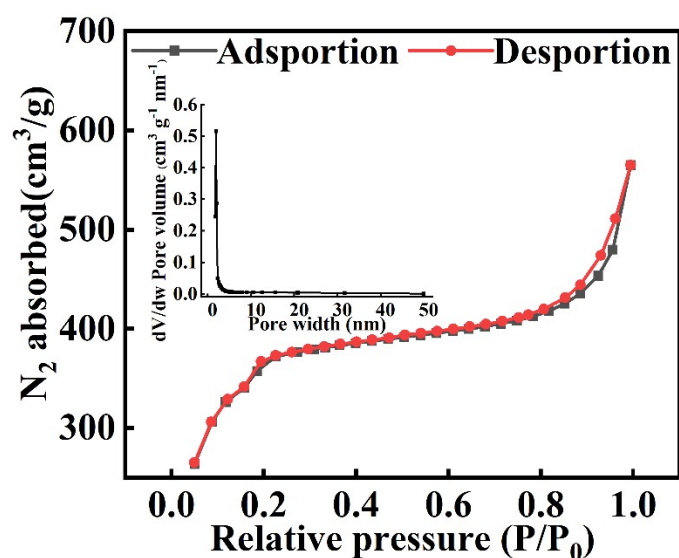

**Fig. S1.** The  $N_2$  adsorption-desorption isotherms of MIL101-(Fe)-MWCNTs-GO. (inserted figure was the pore-size distribution curve).

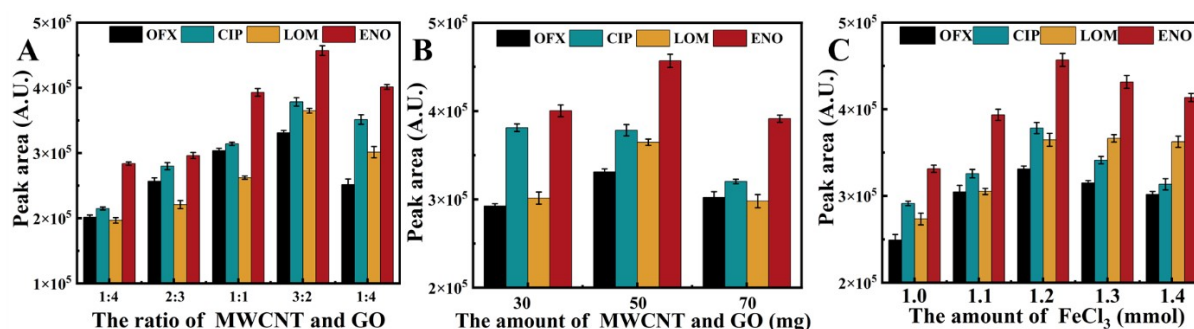

**Fig. S2.** Optimization of MPC component: (A) the ratio of MWCNT and GO, (B) the amount of MWCNT and GO and (C) the amount of  $FeCl_3 \cdot 6H_2O$ . Common experimental conditions: DMF solution 40 mL, extraction and elution condition.

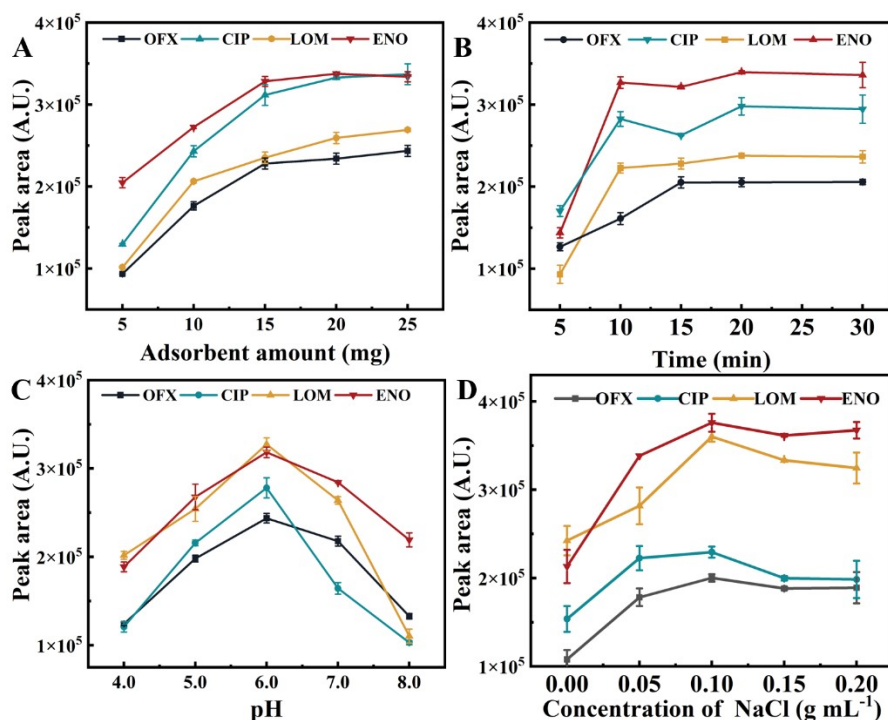

**Fig. S3.** Optimization of MSPE parameters: (A) solvent amount, (B) extraction time, (C) pH, (D) ionic strength. Common experimental conditions: elution solvent MeOH, elution volume 1.5 mL, desorption time 10 min.

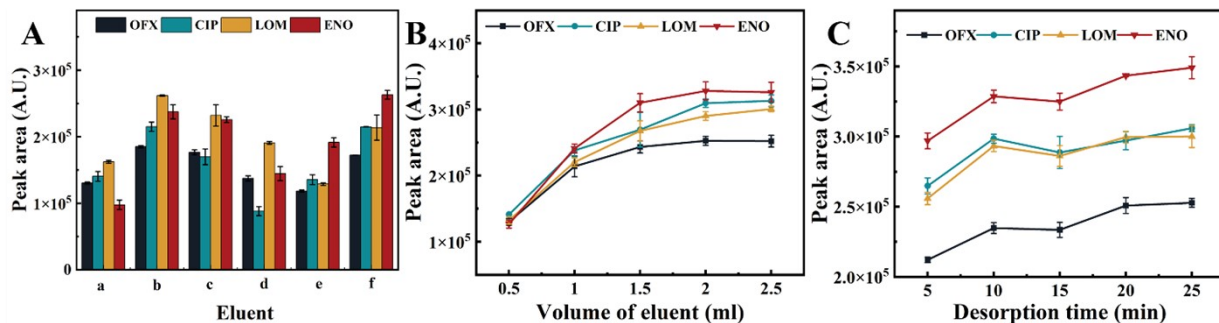

**Fig. S4.** Optimization of elution parameters: (A) Influence of elution solvent, (B) elution volume and (C) desorption time. A: (a) MeOH, (b) MeOH+5% ammonia, (c) MeOH+10% ammonia, (d) ACN, (e) ACN+5% ammonia, (f) ACN+10% ammonia. Common experimental conditions: solvent amount 15 mg, extraction time 15 min, pH 6.

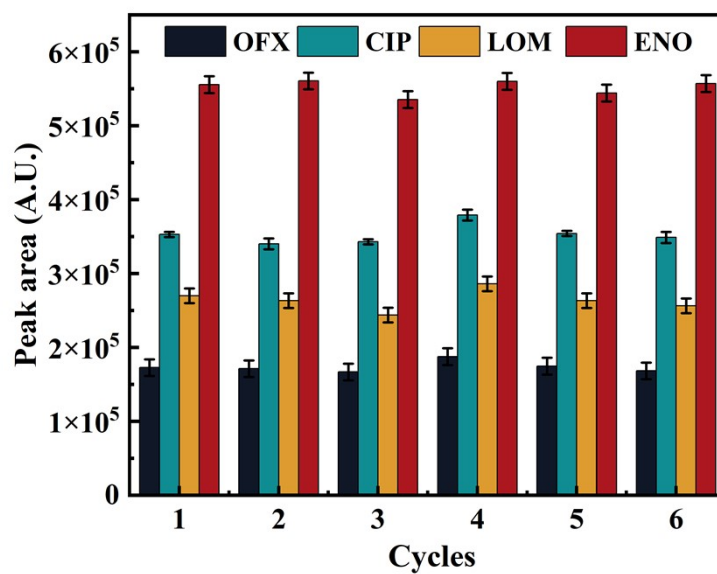

**Fig. S5.** Reusable times of MPCs

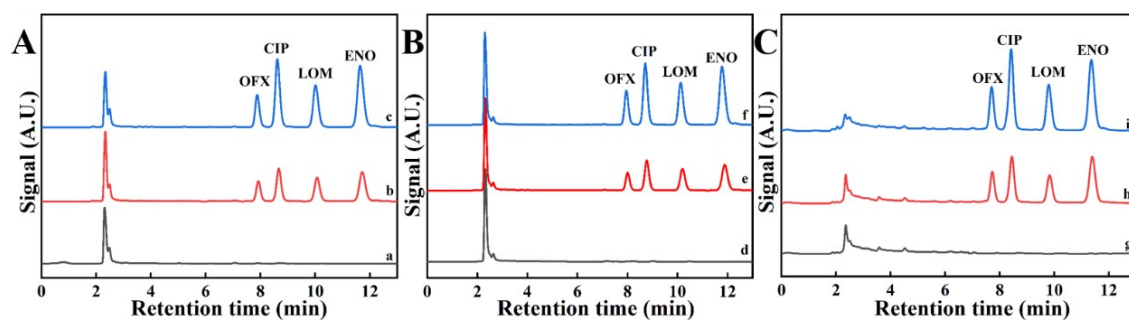

**Fig. S6.** Chromatograms of FQs in (A) milk, (B) pork and (C) lake water after MSPE. a, d, g: blank samples; b, e, h: spiked samples with 50  $\mu\text{g L}^{-1}$  target FQs; c, f, i: spiked samples with 100  $\mu\text{g L}^{-1}$  FQs.
